# Supplementary material
Source: publisher figshare collection journal article supplement (https://geolsoc.figshare.com/ndownloader/files/30955367)
Supplement: Supplementary file 1 [file 30955367]

## Sheet: Titanomagnetite
APPENDIX B: EPMA of titanomagnetite
Sample no.	STKH/16/03	STKH/16/03	STKH/16/03	STKH/16/03	STKH/16/03	STKH/16/03	STKH/16/03	STKH/16/04	STKH/16/04	STKH/16/04	STKH/16/04	STKH/16/04	STKH/16/04	STKH/19/27	STKH/19/27	STKH/19/27	STKH/19/27	STKH/19/27	STKH/19/27	STKH/19/27	STKH/19/27
DataSet/Point	63 / 1 .	67 / 1 .	69 / 1 .	70 / 1 .	78 / 1 .	83 / 1 .	86 / 1 .	35 / 1 .	37 / 1 .	43 / 1 .	47 / 1 .	50 / 1 .	54 / 1 .	11 / 1 .	14 / 1 .	20 / 1 .	22 / 1 .	29 / 1 .	33 / 1 .	38 / 1 .	42 / 1 .
SiO2	0.07	0.069	0.099	0.047	0.075	0.047	0.512	0.067	0.043	0.06	0.069	0.072	0.098	0.089	0.01	0	0.026	0.06	0.088	0.088	0.014
TiO2	7.299	6.457	6.588	9.484	6.2	9.602	5.177	7.401	8.834	4.761	5.051	7.182	6.699	6.723	7.077	7.114	7.186	7.75	7.118	5.854	5.152
Al2O3	0.004	0.028	0.934	0.013	0.028	0.179	0	0.704	0.287	0.909	1.481	0.814	0.316	1.326	0.82	2.036	1.367	2.745	2.798	0.236	0.938
V2O3	0.698	0.871	1.124	0.68	1.076	0.451	0.471	0.962	0.672	1.175	1.05	0.821	1.007	1.002	0.98	0.896	0.823	0.809	0.715	0.877	0.943
Cr2O3	0.179	0.102	0.078	0	0.35	0.233	0.143	0.064	0.036	0.036	0.013	0	0.12	0.557	0.472	0.379	0.275	0.206	0.263	0.383	0.485
Fe2O3	54.5836	54.2705	53.1879	50.0714	55.2973	48.9311	57.1801	50.8898	48.2567	54.8915	55.05	51.5726	53.2371	52.503	52.628	51.2546	52.1793	49.4196	49.1054	56.0047	56.2144
FeO	37.6121	36.1108	36.598	39.5034	36.4899	39.2395	35.5326	36.4749	37.7214	34.378	35.1774	36.5146	36.4857	36.9884	37.2888	37.4517	37.3937	38.1559	37.0916	36.2573	35.2257
MnO	0.283	0.263	0.226	0.41	0.206	0.444	0.158	0.343	0.373	0.128	0.305	0.286	0.208	0.196	0.303	0.262	0.35	0.25	0.251	0.303	0.287
MgO	0.027	0.038	0.057	0.008	0.05	0.029	0.06	0.025	0.034	0.044	0.049	0.032	0.034	0.064	0.039	0.016	0.029	0.062	0.029	0.016	0
NiO	0	0	0.112	0.004	0	0.075	0	0	0.039	0	0	0.004	0.013	0	0.042	0.078	0.102	0	0.124	0.104	0.005
ZnO	0.158	0.128	0.078	0.043	0	0	0.111	0	0	0.036	0	0.38	0.138	0.296	0	0.05	0	0.232	0	0	0.121
CaO	0.145	0.063	0.021	0.05	0.099	0.033	0.504	0	0.014	0.007	0	0.023	0	0	0	0	0.022	0.004	0.016	0.012	0.015
Na2O	0	0.008	0.021	0	0	0	0	0.085	0	0	0	0	0.019	0.008	0	0	0.005	0.002	0.002	0	0.05
K2O	0.002	0	0	0	0	0	0.004	0	0.009	0	0	0.009	0	0	0	0.01	0	0	0	0	0
Total	101.061	98.4084	99.1239	100.314	99.8712	99.2636	99.8528	97.0158	96.3191	96.4255	98.2454	97.7101	98.3749	99.7523	99.6599	99.5473	99.7579	99.6955	97.6011	100.135	99.45
Oxygen (pfu)	32	32	32	32	32	32	32	32	32	32	32	32	32	32	32	32	32	32	32	32	32
Si	0.021171	0.0214405	0.030368	0.014295	0.0229598	0.0144278	0.156545	0.0209974	0.0136002	0.0189595	0.0213278	0.0224267	0.0304011	0.0270744	0.00305349	0	0.00790715	0.0181082	0.0271211	0.0268627	0.00428854
Ti	1.66076	1.50944	1.52032	2.17009	1.4279	2.21751	1.19082	1.74495	2.102	1.13181	1.17456	1.68297	1.56341	1.53862	1.62572	1.62549	1.64412	1.75965	1.65037	1.34437	1.18729
Al	0.0014258	0.0102542	0.337663	0.00465999	0.0101023	0.0647608	0	0.260028	0.106983	0.338529	0.53952	0.298822	0.115533	0.475409	0.295098	0.728791	0.489972	0.976389	1.01631	0.0849052	0.338642
V	0.169255	0.216994	0.276434	0.165821	0.264097	0.111	0.11546	0.241719	0.170408	0.297686	0.260213	0.205031	0.250459	0.244388	0.23992	0.218183	0.200674	0.195757	0.176675	0.21464	0.231599
Cr	0.0428027	0.0250589	0.018917	0	0.084713	0.0565503	0.0345684	0.0158579	0.0090023	0.00899403	0.00317699	0	0.029432	0.133967	0.11395	0.091009	0.0661234	0.049155	0.0640849	0.092436	0.117462
Fe3+	12.4234	12.6907	12.2781	11.4607	12.7394	11.3038	13.1568	12.0022	11.486	13.0532	12.8053	12.0889	12.4284	12.0196	12.0935	11.7149	11.9421	11.2243	11.3891	12.8655	12.9588
Fe2+	9.51345	9.38409	9.38872	10.0482	9.34216	10.0738	9.08582	9.55992	9.97772	9.08502	9.09345	9.51188	9.46573	9.41026	9.52234	9.51283	9.51071	9.63063	9.56024	9.25615	9.02421
Mn	0.0724961	0.0692194	0.0587186	0.105622	0.0534146	0.115444	0.0409177	0.0910482	0.0999241	0.0342588	0.0798513	0.0754543	0.0546528	0.0505022	0.0783656	0.0673995	0.0901572	0.0639073	0.0655215	0.0783421	0.0744645
Mg	0.0121735	0.0176027	0.0260654	0.00362731	0.0228184	0.0132712	0.0273482	0.0116799	0.0160311	0.0207271	0.0225788	0.014859	0.0157235	0.029024	0.0177529	0.00724433	0.0131478	0.0278949	0.0133239	0.00728107	0
Ni	0	0	0.0276364	0.000978653	0	0.0185203	0	0	0.00992254	0	0	0.00100225	0.00324406	0	0.0103164	0.0190567	0.0249534	0	0.0307417	0.0255377	0.00123207
Zn	0.0352771	0.0293623	0.0176632	0.0096549	0	0	0.0250544	0	0	0.00839793	0	0.0873793	0.0316035	0.0664742	0	0.0112107	0	0.05169	0	0	0.0273628
Ca	0.0469876	0.0209749	0.00690198	0.0162941	0.0324725	0.010854	0.16511	0	0.00474435	0.00237	0	0.00767596	0	0	0	0	0.00716874	0.00129348	0.00528345	0.00392483	0.00492318
Na	0	0.00481974	0.0124896	0	0	0	0	0.0516485	0	0	0	0	0.0114278	0.00471851	0	0	0.00294825	0.00117031	0.00119509	0	0.029696
K	0.000771669	0	0	0	0	0	0.00156022	0	0.00363142	0	0	0.00357629	0	0	0	0.00387461	0	0	0	0	0
Total	24	24	24	24	24	24	24	24	24	24	24	24	24	24	24	24	24	24	24	24	24

## Sheet: Ilmenite
APPENDIX B: EPMA of ilmenite
Sample no.	STKH/16/03	STKH/16/03	STKH/16/03	STKH/16/03	STKH/16/03	STKH/16/03	STKH/16/03	STKH/16/04	STKH/16/04	STKH/16/04	STKH/16/04	STKH/16/04	STKH/16/04	STKH/19/27	STKH/19/27	STKH/19/27	STKH/19/27	STKH/19/27	STKH/19/27	STKH/19/27	STKH/19/27	STKH/19/27
DataSet/Point	62 / 1 .	66 / 1 .	68 / 1 .	71 / 1 .	77 / 1 .	82 / 1 .	85 / 1 .	36 / 1 .	38 / 1 .	44 / 1 .	48 / 1 .	49 / 1 .	53 / 1 .	10 / 1 .	12 / 1 .	13 / 1 .	21 / 1 .	23 / 1 .	30 / 1 .	32 / 1 .	37 / 1 .	43 / 1 .
SiO2	0	0.004	0.025	0	0	0.017	0.006	0	0	0.017	0.01	0.039	0	0.009	0.007	0	0.02	0	0	0.023	0	0.008
TiO2	49.764	50.306	49.837	50.865	49.901	50.815	50.037	49.664	50.602	49.88	50.067	49.841	50.004	48.033	47.968	48.959	48.28	47.821	48.541	48.196	48.292	48.513
Al2O3	0.137	0.08	0.151	0.15	0.131	0.098	0.128	0.15	0.084	0.137	0.119	0.133	0.128	0.089	0.176	0.127	0.166	0.356	0.171	0.208	0.132	0.105
V2O3	0.114	0.043	0.116	0.001	0.213	0.088	0.015	0.048	0.076	0.135	0.114	0.058	0.131	0.291	0.184	0.061	0.197	0.051	0.071	0.049	0.026	0.206
Cr2O3	0.124	0	0.006	0.089	0	0.092	0.004	0.072	0.037	0	0	0.027	0.061	0.261	0.127	0.238	0.017	0.118	0.149	0.094	0	0.069
Fe2O3	6.96889	5.77177	6.75708	3.56114	5.24227	3.54194	6.39382	5.07378	3.84857	4.71638	3.70749	5.6605	3.58848	8.0746	10.0349	7.27067	9.27904	9.68476	9.69478	9.54432	9.09176	8.67944
FeO	42.7081	43.0173	42.4237	43.7865	42.7538	43.2338	42.7625	42.2724	43.2049	42.478	43.4518	42.7374	42.8209	41.2791	40.7541	42.0875	40.9593	41.0062	41.5942	41.4836	40.8858	41.5378
MnO	1.862	2.04	2.147	1.818	1.768	2.2	1.938	1.915	1.933	1.887	1.438	1.872	1.615	1.588	2.05	1.636	1.923	1.647	1.772	1.614	2.148	1.913
MgO	0.037	0.071	0.077	0.029	0.075	0.01	0.028	0.081	0.077	0.099	0.069	0.052	0.047	0.071	0.109	0.04	0.088	0.088	0.072	0.075	0.055	0.072
NiO	0.065	0	0.035	0	0	0.155	0.024	0.277	0.05	0	0	0	0.148	0.009	0.134	0.035	0.069	0	0	0	0.041	0.035
ZnO	0	0	0	0	0.002	0.012	0.185	0	0	0.237	0	0	0.176	0.048	0	0	0.265	0	0.094	0	0.207	0
CaO	0.034	0.004	0.007	0.06	0.015	0.072	0.035	0.013	0.04	0	0.015	0.013	0	0.041	0.004	0.009	0.013	0.012	0.015	0.019	0	0.01
Na2O	0	0.008	0.018	0	0.041	0	0	0	0.026	0.023	0	0.03	0.031	0.022	0	0.039	0.016	0.037	0.01	0.023	0.013	0
K2O	0	0.002	0	0	0	0	0.004	0.012	0	0.003	0	0	0	0	0	0	0	0	0	0	0	0
Total	101.814	101.343	101.575	100.36	100.142	100.318	101.554	99.5782	99.9784	99.5954	98.9813	100.424	98.7504	99.8067	101.541	100.502	101.272	100.821	102.184	101.306	100.892	101.14
Oxygen (pfu)	6	6	6	6	6	6	6	6	6	6	6	6	6	6	6	6	6	6	6	6	6	6
Si	0	0.000199615	0.00124437	0	0	0.000856249	0.000298984	0	0	0.000862335	0.000510373	0.00196235	0	0.000456456	0.000349148	0	0.000999968	0	0	0.00114914	0	0.000400574
Ti	1.86094	1.88866	1.86621	1.92631	1.89427	1.9255	1.87581	1.89657	1.92333	1.9035	1.92238	1.88668	1.92468	1.83272	1.79996	1.85443	1.81603	1.80507	1.81032	1.81157	1.82441	1.82747
Al	0.00802587	0.00470521	0.00885811	0.00889924	0.0077904	0.00581745	0.00751731	0.00897375	0.00500174	0.00819037	0.00715797	0.00788713	0.00771824	0.00531989	0.0103462	0.00753593	0.00978182	0.0210514	0.00999073	0.012248	0.00781227	0.00619638
V	0.00454323	0.00172046	0.00462924	4.03599e-05	0.008617	0.00355368	0.000599283	0.00195349	0.00307853	0.00549041	0.00466483	0.00233982	0.00537363	0.011833	0.00735822	0.00246236	0.00789707	0.00205158	0.00282194	0.00196284	0.0010468	0.00826997
Cr	0.00487319	0	0.000236121	0.00354219	0	0.00366365	0.000157591	0.00288958	0.00147796	0	0	0.00107411	0.0024675	0.0104658	0.0050083	0.00947392	0.000672017	0.00468093	0.00583992	0.0037132	0	0.0027316
Fe3+	0.260685	0.21676	0.253107	0.134906	0.199062	0.134255	0.23977	0.193819	0.146326	0.180042	0.142398	0.21434	0.138166	0.308187	0.376669	0.275479	0.349137	0.365679	0.361677	0.358861	0.343584	0.327055
Fe2+	1.77539	1.79533	1.76597	1.84338	1.80416	1.82114	1.78208	1.79453	1.82552	1.80202	1.85466	1.79841	1.83222	1.75087	1.70001	1.77214	1.71268	1.72065	1.72443	1.73336	1.71707	1.73942
Mn	0.0783938	0.0862282	0.0905161	0.077515	0.0755615	0.0938555	0.0817968	0.0823345	0.0827187	0.0810746	0.062163	0.0797817	0.0699859	0.0682171	0.0866065	0.0697664	0.0814369	0.0699929	0.0744038	0.0683021	0.0913624	0.0811322
Mg	0.00274174	0.00528202	0.00571357	0.00217627	0.0056416	0.000750861	0.00208	0.00612944	0.00579943	0.00748637	0.00524983	0.00390053	0.00358475	0.00536814	0.00810487	0.00300224	0.00655914	0.00658212	0.00532092	0.00558617	0.00411736	0.00537445
Ni	0.00259903	0	0.00140139	0	0	0.00628008	0.000962033	0.0113107	0.00203207	0	0	0	0.00609111	0.000367182	0.00537648	0.00141751	0.00277516	0	0	0	0.0016562	0.00140975
Zn	0	0	0	0	7.44999e-05	0.000446196	0.00680552	0	0	0.00887501	0	0	0.0066475	0.00179718	0	0	0.00978126	0	0.00344006	0	0.00767381	0
Ca	0.00181079	0.000213878	0.000373318	0.00323616	0.000810956	0.00388559	0.00186869	0.00070704	0.00216531	0	0.00082026	0.000700855	0	0.00222799	0.000213769	0.000485504	0.000696422	0.000645103	0.000796728	0.00101712	0	0.000536495
Na	0	0.000774052	0.00173711	0	0.0040111	0	0	0	0.00254687	0.00226205	0	0.00292671	0.00307511	0.00216335	0	0.00380705	0.00155104	0.00359934	0.000961153	0.00222802	0.00126572	0
K	0	0.000127327	0	0	0	0	0.000254282	0.000777082	0	0.000194136	0	0	0	0	0	0	0	0	0	0	0	0
Total	4	4	4	4	4	4	4	4	4	4	4	4	4	4	4	4	4	4	4	4	4	4
